# Supplementary material
Source: publisher figshare collection journal article supplement (https://tandf.figshare.com/ndownloader/files/22123365)
Supplement: Supplementary file 1 [file 22123365]

Supplementary Table s1 Multivariable proportional hazards regression model assessing the effect of covariates on the sub-distribution of death from bladder cancer with death from other cause as a competing risks event in the overall population of 169 patients

|  | HR | 95%CI | *p* |
| --- | --- | --- | --- |
| RC vs RT | 1.26 | 0.52 – 3.01 | 0.6 |
| Age | 0.99 | 0.95 – 1.04 | 0.9 |
| Age adjusted CCI | 1.01 | 0.88 – 1.15 | 0.9 |
| NMIBC (ref) |  |  |  |
| cT2 | 3.2 | 0.96 – 10.6 | 0.06 |
| cT3 | 8.06 | 1.7 – 38.1 | 0.008 |
| RT = radiotherapy; RC = Radical cystectomy; CCI = Charlson comorbidity index; HR = Hazard ratio; CI = Confidence interval; NMIBC = non-muscle-invasive bladder cancer | | | |
